# Supplementary material for: Facile synthesis of thermo-, pH-, CO2- and oxidation-responsive poly(amido thioether)s with tunable LCST and UCST behaviors
Source: Royal Society of Chemistry journal article supplement (doi:10.1039/c7py01351e), 2017-01-01
Supplement: c7py01351e1.pdf [file c7py01351e1.pdf]

## Supporting Information

Facile synthesis of thermo-, pH-, CO<sub>2</sub>- and oxidation-responsive poly(amido thioether)s with tunable LCST and UCST behaviors

Hongcan Zhang, Jian Zhang, Wenxue Dai and Youliang Zhao\*

Suzhou Key Laboratory of Macromolecular Design and Precision Synthesis, Jiangsu Key Laboratory of Advanced Functional Polymer Design and Application, State and Local Joint Engineering Laboratory for Novel Functional Polymeric Materials, College of Chemistry, Chemical Engineering and Materials Science, Soochow University, Suzhou 215123, China

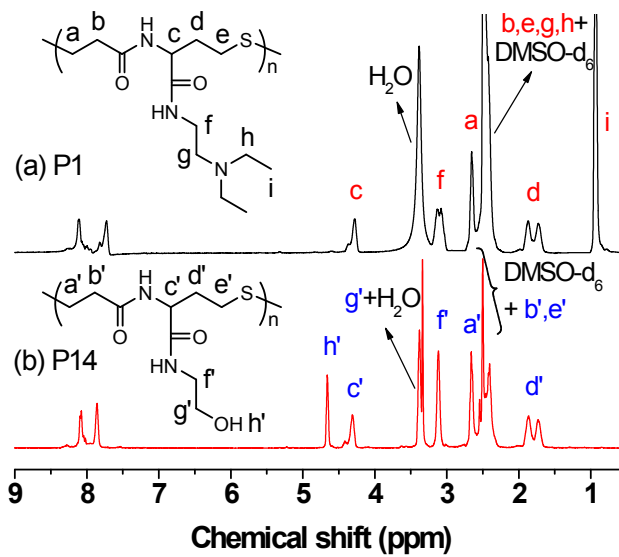

**Fig. S1**  $^1\text{H}$  NMR spectra of poly(amido thioether)s bearing *N*-diethylaminoethylamido (a) or *N*-hydroxyethylamido (b) side group.

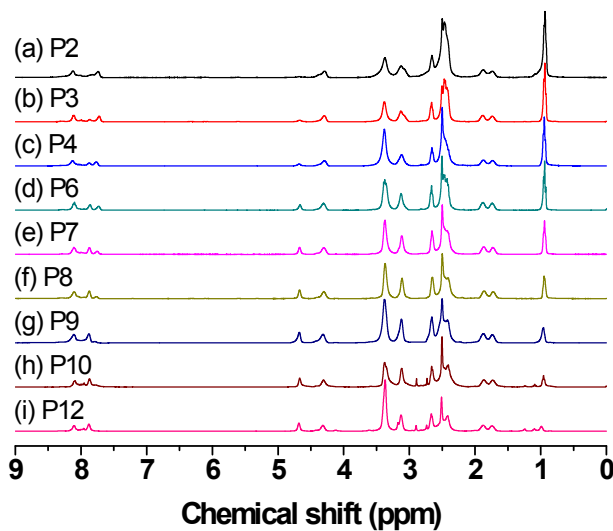

**Fig. S2**  $^1\text{H}$  NMR spectra of other poly(amido thioether)s with *N*-diethylaminoethylamido and *N*-hydroxyethylamido side groups in  $\text{DMSO-}d_6$ .

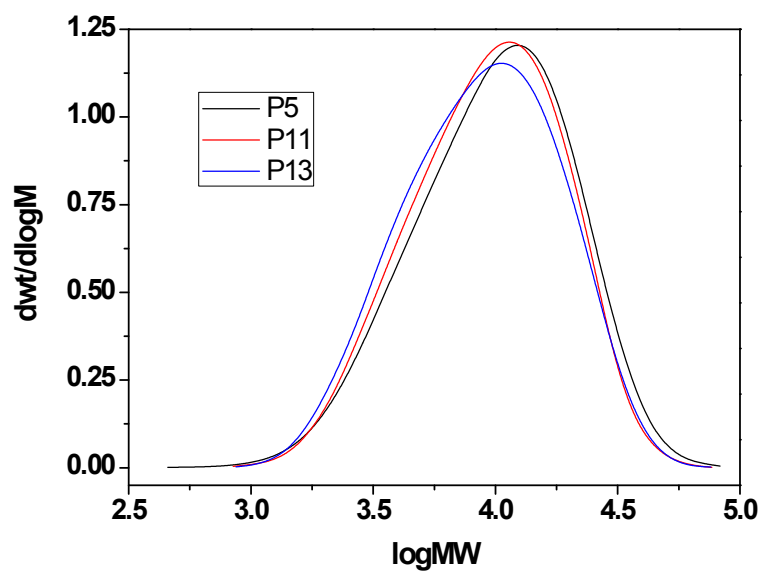

Fig. S3 GPC traces of typical poly(amido thioether) copolymers.

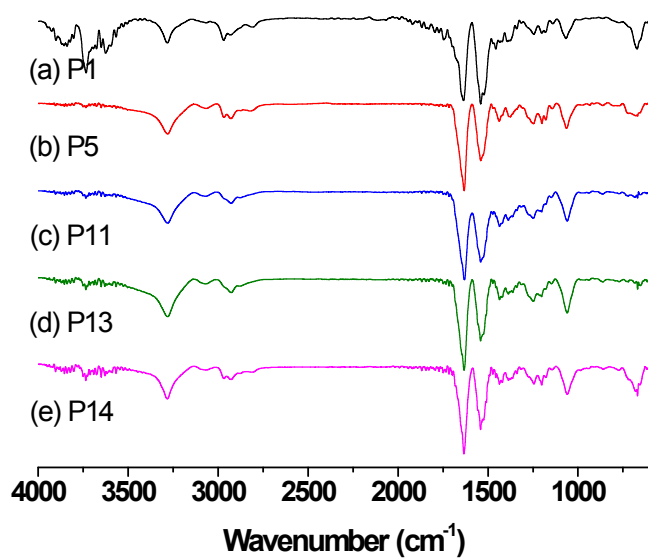

Fig. S4 FT-IR spectra of various poly(amido thioether) copolymers.

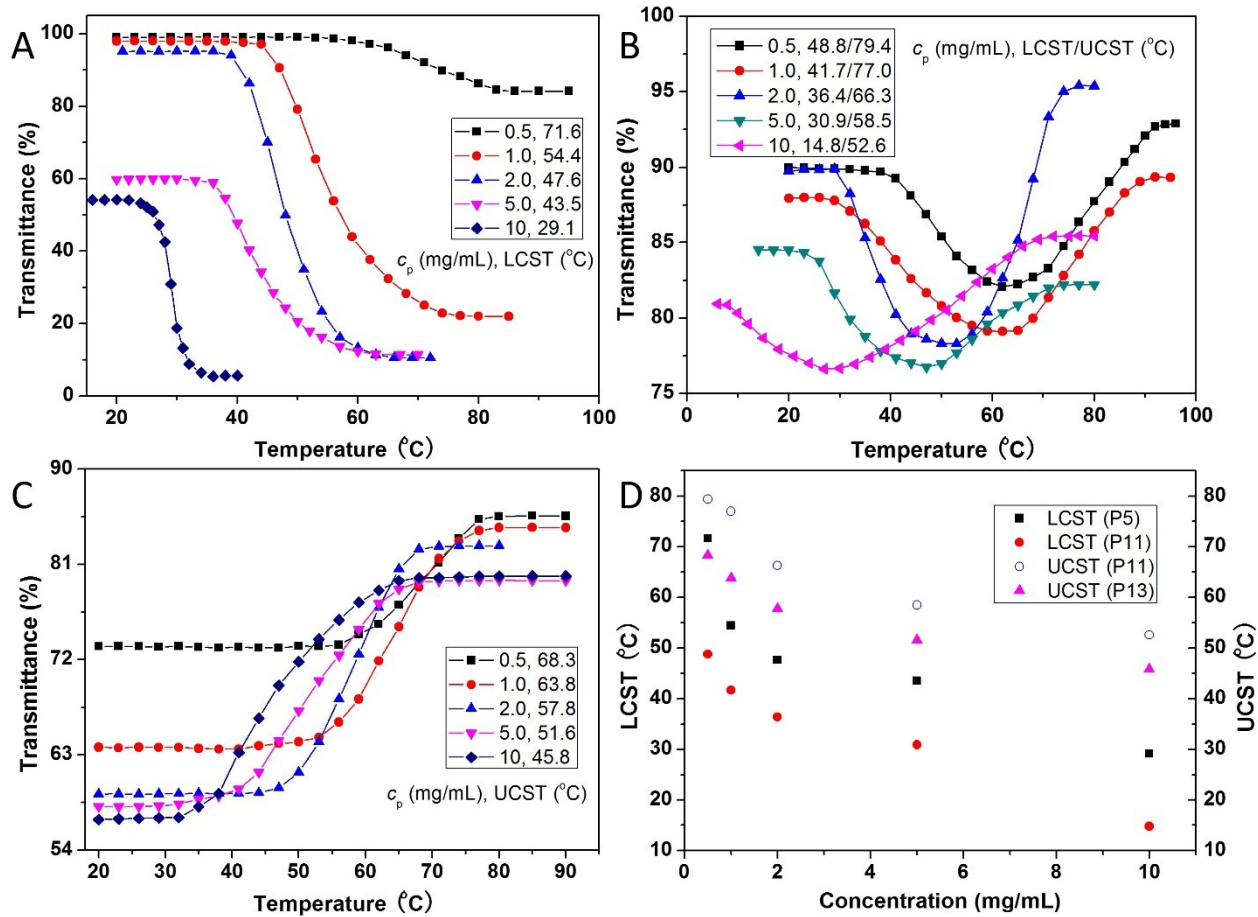

**Fig. S5** Dependence of transmittances (A, P5; B, P11; C, P13) and cloud points (D) of copolymer aqueous solutions on concentration.

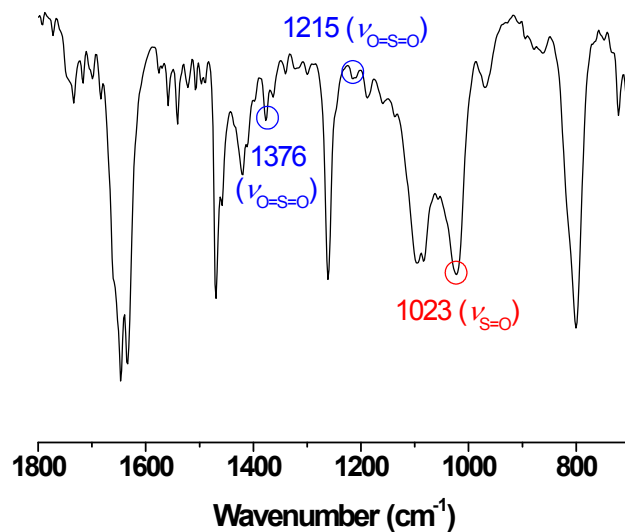

**Fig. S6** FT-IR spectrum of P5'' in the range of 700–1800  $\text{cm}^{-1}$ , in which the copolymer was obtained by oxidation of P5 using 100-fold  $\text{H}_2\text{O}_2$  at 25  $^\circ\text{C}$  overnight.

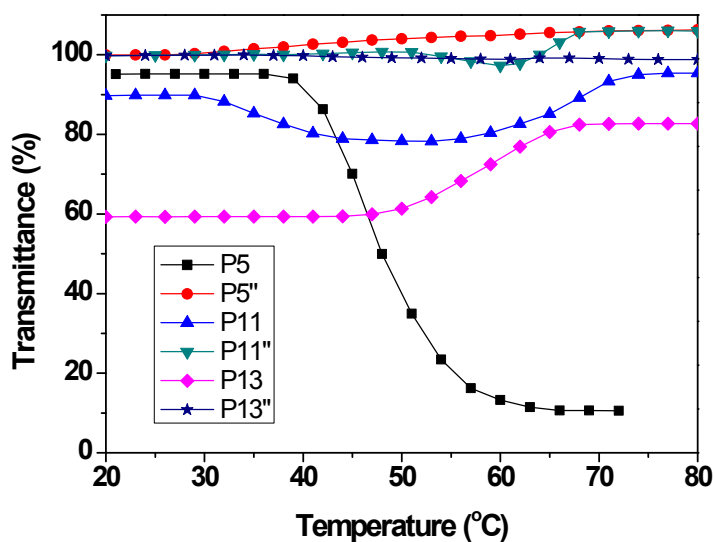

**Fig. S7** Temperature-dependent transmittances of copolymer aqueous solutions ( $c_p = 2.0 \text{ mg mL}^{-1}$ ) before and after oxidation using 100-fold  $\text{H}_2\text{O}_2$ .
